# Supplementary material
Source: PubMed Central journal article supplement (PMC9087623)
Supplement: IJGO-150-368-s001.pdf [file IJGO-150-368-s001.pdf]

# Sugerencias de manejo para pacientes con cánceres ginecológicos y condiciones preinvasivas del cérvix durante la pandemia por COVID-19. Encuesta Latinoamérica

## I. Consideraciones generales

Este documento no pretende ser una "Guía de manejo" ni tampoco es un documento de consenso, ya que la metodología usada, no permiten calificarlo como ninguno de los anteriores. La intención de este trabajo, es proveer al clínico elementos de juicio con base en la literatura medica internacional, para orientar el manejo de la consulta externa, así como el tratamiento de las patología cervical y en especial el manejo quirúrgico de las pacientes con cáncer ginecológico durante la contingencia de orden mundial, producida por COVID-19.

Se hace necesario racionalizar el recurso quirúrgico, en vista de la limitación que se produce tanto en la disponibilidad de quirófanos, como en el número de camas disponibles para hospitalizar a las pacientes en el pos-operatorio, adicionalmente las unidades de cuidado intensivo, se van a ver ocupadas potencialmente por pacientes con requerimientos de ventilación mecánica como consecuencia de la infección por el coronavirus SARS-2.

Es importante disminuir el riesgo de contagio en forma bidireccional, al cuerpo médico con el adecuado uso de elementos de protección personal recomendados para cada área y según las políticas de cada institución y para las pacientes minimizando el riesgo de adquirir la infección por COVID-19, en quienes si pueden desde el punto de vista oncológico, dar espera a su manejo quirúrgico y en las que no justifica una exposición, bien sea debido a que se trata de patologías preinvasivas, de bajo riesgo y/o buen pronóstico o aquellas a las que puede ofrecérseles un manejo médico alterno o previo al manejo estándar recomendado.

Durante esta época es de suma importancia discutir el manejo de las pacientes- siempre que esto sea posible- en juntas multidisciplinarias, con la participación de las diferentes áreas que se articulan con la especialidad, siendo las mas importantes: Oncología clínica, Radioterapia, Patología e Imágenes diagnósticas.

El manejo quirúrgico de las pacientes- o su postergación-, se derivará de una discusión abierta y transparente entre los actores implicados en las decisiones: Médico tratante, especialidades relacionadas, representantes institucionales y por supuesto la paciente.

La determinación de llevar a quirófano a una paciente con cáncer ginecológico, estará supeditada a la normatividad nacional e institucional vigentes, ASI COMO A CADA FASE DE LA PANDEMIA, y por supuesto a la disponibilidad de recursos: Necesidad de testear a todas las pacientes para coronavirus SARS-2 (Disponibilidad PCR y/o pruebas rápidas), determinaciones respecto al carácter urgente de la cirugía, disponibilidad de equipo de protección personal(EPP) adecuado para el personal del quirófano, etc...

Es de vital importancia en la buena relación médico paciente el dejar claro el diagnóstico oncológico y su pronóstico, así como el riesgo de variabilidad en este último según los cambios y ajustes en el manejo médico-quirúrgico que se realice por las condiciones y fases de la pandemia como ya se expresó, por lo tanto, se recomienda considerar en el consentimiento informado, el riesgo de adquirir la infección por el COVID19, al estar en un centro hospitalario y en especial en caso de requerir manejo quirúrgico.

Este documento fue elaborado por miembros de la Asociación Colombiana de Ginecólogos Oncólogos (ACGO), así como los Drs. Eduardo Guerrero (Oncólogo radioterápico) y Marc Pierre (Oncólogo Clínico).

A través de esta encuesta se evaluarán en diferentes países de Latinoamérica posibles estrategias para el manejo de pacientes con cánceres ginecológicos y condiciones preinvasivas del cérvix durante la pandemia por COVID-19. A partir de sus respuestas, se generará un documento final de sugerencias con la información obtenida. Gracias por su tiempo y valiosos aportes!

**\*Obligatorio**

1. Dirección de correo electrónico \*

---

2. Fecha en que usted llena la encuesta \*

---

*Ejemplo: 7 de enero de 2019*

### Características sociodemográficas

3. Edad \*

*Marca solo un óvalo.*

- ☐ Menor de 35
- ☐ 35-44
- ☐ 45-54
- ☐ 55-64
- ☐ Mayor de 65

## 4. Sexo \*

*Marca solo un óvalo.*

- ☐ Mujer
- ☐ Hombre

## 5. País \*

*Marca solo un óvalo.*

- ☐ Argentina
- ☐ Bolivia
- ☐ Chile
- ☐ Ecuador
- ☐ El Salvador
- ☐ Guatemala
- ☐ México
- ☐ Panamá
- ☐ Paraguay
- ☐ Perú
- ☐ Uruguay
- ☐ Brasil
- ☐ Otros: \_\_\_\_\_

## II. Consideraciones específicas

### A. Atención de consulta

El nuevo coronavirus es altamente contagioso. Se han descrito tasas de hasta un 41% de transmisión del SARS-CoV-2 re con el ámbito hospitalario (1). De acuerdo a los lineamientos gubernamentales, actualmente varios países se encuentran bajo aislamiento preventivo, obligando a la población a permanecer en casa con el fin de contener el brote. Esta conducta reduce el riesgo de infección para pacientes, personal y proveedores, pero también para otras personas en contacto con ellos. (2) El desafío para el ginecólogo oncólogo en este escenario es continuar realizando un diagnóstico precoz de las patologías neoplásicas en su fase inicial y como enfermedad recurrente. Por otra parte, se ha establecido previamente el bajo rendimiento de las pruebas diagnósticas realizadas rutinariamente y la importancia de orientar los síntomas para una búsqueda dirigida de recaída tumoral (3).

Bajo esta premisa, la teleconsulta se constituye como una herramienta eficiente para hacer un triage de las pacientes que requieren una valoración presencial, disminuyendo la exposición innecesaria a un ambiente hospitalario en pacientes oncológicas. Es fundamental un dialogo abierto con las pacientes y/o familiares, aclarando que la adopción de esta modalidad responde a un esfuerzo para disminuir el riesgo durante la pandemia. Como acto médico, se sugiere registrarlo en la historia clínica.

En esta modalidad deben considerarse tanto las video-conferencias, como las llamadas telefónicas o comunicaciones por correo electrónico debidamente registradas.

#### Referencias:

1. Xiao Y, Tan C, Duan J, Wu A, Li C. An Effective Model for the Outpatient Management of COVID-19. Infect Control Hosp Epidemiol. 2020; 1-4
2. Pathoulas JT, Stoff BK, Lee KC, Farah RS. Ethical Outpatient Dermatology Care During the Coronavirus (COVID-19) Pandemic [published online ahead of print, 2020 Mar 26]. J Am Acad Dermatol. 2020;S0190-9622(20)30467-9.
3. Salani R, Khanna N, Frimer M, Bristow RE, Chen LM. An update on post-treatment surveillance and diagnosis of recurrence in women with gynecologic malignancies: Society of Gynecologic Oncology (SGO) recommendations. Gynecol Oncol. 2017;146(1):3-10. doi:10.1016/j.ygyno.2017.03.022

6. 1. Considera que pacientes con alta sospecha de neoplasia ginecológica (masa anexial) o con diagnóstico histológico confirmado de cáncer ginecológico, deben ser valoradas por primera vez presencialmente? \*

*Marca solo un óvalo.*

- ☐ De acuerdo
- ☐ En desacuerdo

7. 2. Considera que pacientes en postoperatorio de cirugía por cáncer ginecológico, para revisión de anatomía patológica, deben ser valoradas presencialmente? \*

*Marca solo un óvalo.*

- ☐ De acuerdo
- ☐ En desacuerdo

8. 3. Cree que pacientes con diagnóstico de neoplasia ginecológica en seguimiento postratamiento deben ser contactadas mediante teleconsulta, indagar sobre síntomas que puedan hacer sospechar enfermedad recurrente, y en caso de presentarlos, citarlas para orientar el examen físico y los paraclínicos con el fin de descartar recaída tumoral? \*

*Marca solo un óvalo.*

- ☐ De acuerdo
- ☐ En desacuerdo

9. 4. Cree que pacientes con diagnóstico de neoplasia ginecológica en seguimiento postratamiento deben ser contactadas mediante teleconsulta, indagar sobre síntomas que puedan hacer sospechar enfermedad recurrente, y en caso de NO presentarlos, citarlas en los siguientes tres meses luego de que se controle la pandemia, para continuar seguimiento institucional? \*

*Marca solo un óvalo.*

- ☐ De acuerdo
- ☐ En desacuerdo

10. 5. Cree que la teleconsulta debe ser realizada por el ginecólogo oncólogo tratante de las instituciones?. En caso de desacuerdo que personal de salud sugiere que realice este proceso? \*

*Marca solo un óvalo.*

- ☐ De acuerdo
- ☐ En desacuerdo

11. 5.1 Si en la pregunta anterior contestó en desacuerdo, por favor mencione que otro personal de salud debería realizar la teleconsulta

---

---

---

---

---

12. 6. En caso de que considere que la paciente debe ser valorada presencialmente, sugiere que se haga un triage mediante de teleconsulta en búsqueda de caso sospechoso de Covid-19, según los criterios epidemiológicos actuales? \*

*Marca solo un óvalo.*

- ☐ De acuerdo
- ☐ En desacuerdo

## B. Patología cervical preinvasora

Existen guías específicas para el manejo de patología cervical (ASCCP guidelines 2019)(4). A la luz de la actual pandemia COVID-19, y en entornos donde se han suspendido todas las visitas no esenciales al consultorio médico y los procedimientos electivos, ASCCP ha generado recomendaciones para el enfoque de la patología preinvasiva cervical(5). No hay lineamientos específicos respecto al tipo de conización a realizar. En cualquiera de las técnicas (electrocirugía, conización fría), se sugiere utilizar los elementos de protección personal para prevención de contagio por coronavirus (COVID-19) Estas recomendaciones no deben considerarse pautas de manejo definitivas y reconocen que algunas personas con pruebas anormales de detección de cáncer cervical y hallazgos histológicos requerirán una revisión caso por caso (5).

Una vez que se controle el brote de COVID-19, las pacientes deberán ser tratadas nuevamente de acuerdo con los estándares de Colposcopia ASCCP(4)

### Referencias:

4. Perkins RB, Guido RS, Castle PE, Chelmow D, Einstein MH, Garcia F, et al. 2019 ASCCP Risk-Based Management Consensus Guidelines for Abnormal Cervical Cancer Screening Tests and Cancer Precursors. J Low Genit Tract Dis. 2020 Apr;24(2):102-131. doi: 10.1097/LGT.0000000000000525.

5. ASCCP Interim Guidance for Timing of Diagnostic and Treatment Procedures for Patients with Abnormal Cervical Screening Tests. Disponible online.

<https://www.asccp.org/covid-19>. Acceso el 30 de marzo de 2020

13. 7. Las pacientes que presenten una citología cervicovaginal que reporten lesión de bajo grado con o sin test de ADN- VPH (+) podrían ser diferidas para su valoración colposcópica al menos 6 meses? \*

*Marca solo un óvalo.*

- ☐ De acuerdo
- ☐ En desacuerdo

14. 8. Las pacientes que presenten una citología cervicovaginal que reporte lesión epitelial de alto grado con o sin test de ADN- VPH (+) podrían ser diferidas para su valoración colposcópica 3 meses? \*

*Marca solo un óvalo.*

- ☐ De acuerdo
- ☐ En desacuerdo

15. 9. Las pacientes que presenten una biopsia con NIC II-III, o adenocarcinoma in situ, sin sospecha de infiltración podrían ser diferidas en su manejo escisional 3 meses? \*

*Marca solo un óvalo.*

- ☐ De acuerdo  
☐ En desacuerdo

16. 10. Las pacientes que presenten una biopsia con lesión de alto grado y sospecha de microinvasión a la colposcopia podrían ser diferidas en su manejo escisional máximo un mes? \*

*Marca solo un óvalo.*

- ☐ De acuerdo  
☐ En desacuerdo

17. 11. Pacientes que presenten indicación de conización diagnóstica (falta de correlación citología –colposcopia-biopsia, legrado endocervical positivo), podrían ser diferidas en su manejo escisional 3 meses? \*

*Marca solo un óvalo.*

- ☐ De acuerdo  
☐ En desacuerdo

### C. Cáncer de cuello uterino

En estos momentos de contingencia, se han puesto a consideración algunas alternativas en el manejo de las pacientes con neoplasia cervical

18. 12. Está usted de acuerdo en ofrecer tratamiento primario con radioterapia(+/- quimioterapia concomitante) a una paciente postmenopáusica (>50 años) con cáncer de cuello uterino en estadio temprano, con lesión visible o postconización con márgenes positivos, quien normalmente sería candidata de manejo quirúrgico(6) \*

Referencia: 6. NCCN Guidelines: Radiation can be an option for medically inoperable patients or those who refuse surgery. Lancet. 1997;350(9077):535.

*Marca solo un óvalo.*

- ☐ De acuerdo
- ☐ En desacuerdo

19. 13. Está usted de acuerdo en ofrecer a una paciente con cancer de cuello uterino postconización con márgenes negativos, o con diagnóstico por biopsia sin enfermedad cervical visible, sin deseos de preservación de fertilidad, sin sospecha de compromiso ganglionar por imagenología, diferir tratamiento definitivo mínimo por 3 meses(7,8) \*

Referencia: 7. Ramirez PT, Pareja R, Rendón GJ et al. Management of low-risk early-stage cervical cancer: should conization, simple trachelectomy, ¿or simple hysterectomy replace radical surgery as the new standard of care? Gynecol Oncol. 2014 Jan;132(1):254-9 / 8. Halaska MJ, Uzan C, Han SN, et al. Characteristics of patients with cervical cancer during pregnancy: a multicenter matched cohort study. An initiative from the International Network on Cancer, Infertility and Pregnancy. Int J Gynecol Cancer. 2019 Mar 20

*Marca solo un óvalo.*

- ☐ De acuerdo
- ☐ En desacuerdo

20. 14. Está usted de acuerdo en NO realizar estadiaje quirúrgico laparoscópico a las pacientes con cancer de cuello uterino localmente avanzado, previo a tratamiento con quimio-radioterapia?(9) \*

Referencia: 9. Pedro T Ramirez, Rene Pareja, Ane Gerda Z Eriksson, Michael Frumovitz. International Gynecologic Cancer Society 2019 meeting summary. Int J Gynecol Cancer 2020;30:167.

*Marca solo un óvalo.*

- ☐ De acuerdo
- ☐ En desacuerdo

21. 15. Esta usted de acuerdo con NO programar para cirugía, pacientes con recurrencia central de cancer de cuello uterino, con mas de 6 meses de periodo libre de enfermedad, candidatas para exenteración, y en su lugar, remitir a oncología clínica para tratamiento con quimioterapia?(10) \*

Referencia: 10. Tewari KS, Sill MW, Long HJ 3rd, et al. Improved survival with bevacizumab in advanced cervical cancer. N Engl J Med. 2014 Feb 20;370(8):734-43.

*Marca solo un óvalo.*

- ☐ De acuerdo
- ☐ En desacuerdo

D.  
Cáncer  
de  
ovario

Ante esta patología que vemos cada día en mayores proporciones en nuestra consulta, especialmente en casos subagudos en los servicios de urgencias, donde es importante trabajar en equipo con los colegas de los grupos de imágenes diagnósticas, patología, oncología clínica y cirugía oncológica, debemos tener la especial consideración que probablemente debemos regresar en el tiempo en el abordaje inicial, recurriendo nuevamente a confirmar diagnóstico pretratamiento con base en citologías y no en histología por medio de la cirugía laparoscópica como es el estándar de cuidado hoy día.

22. 16. En pacientes con aparente cáncer epitelial de ovario avanzado, con ascitis y carcinomatosis, con elevación del Ca 125, con patología demostrada por citología o por biopsia con aguja cortante(En lo posible no fagotti), se prefiere hacer QT Neo-adyuvante con carbo/Taxol por 3-4 ciclos, y luego cirugía de intervalo, de acuerdo a evolución clínica e imagenológica(11) \*

Referencia: 11. Vergote I, Coens C, Nankivell M, et al, on behalf of EORTC; MRC CHORUS study investigators. Neoadjuvant chemotherapy versus debulking surgery in advanced tubo-ovarian cancers: pooled analysis of individual patient data from the EORTC 55971 and CHORUS trials. Lancet Oncol. 2018 Dec;19(12):1680-1687.2.

*Marca solo un óvalo.*

- ☐ De acuerdo
- ☐ En desacuerdo

23. 17. En pacientes platino-sensibles con actual recurrencia de mas de 1 sitio, se recomienda dar quimioterapia basada en Platino (con o sin bevacizumab), en lugar de realizar cito-reducción secundaria.(12) \*

Referencia: 12.Coleman RL, Spirtos NM, Enserro D, et al. Secondary Surgical Cytoreduction for Recurrent Ovarian Cancer. N Engl J Med. 2019 Nov 14;381(20):1929-1939

*Marca solo un óvalo.*

- ☐ De acuerdo
- ☐ En desacuerdo

24. 18. Las pacientes con masas pélvicas y sospecha de cáncer de ovario, serán filtradas por el ginecólogo oncólogo. Se llevará a cirugía con congelación (de acuerdo a disponibilidad de este servicio) a aquellas con un riesgo importante de malignidad, basado en el criterio clínico e imágenes y marcador disponible, determinado por ginecólogo oncólogo. Las otras se derivarán para manejo por ginecología y Obstetricia(13,14) \*

Referencias: 13. Timmerman D, Van Calster B, Testa A, et al. Predicting the risk of malignancy in adnexal masses based on the Simple Rules from the International Ovarian Tumor Analysis group. Am J Obstet Gynecol. 2016 Apr;214(4):424-437. doi: 10.1016/j.ajog.2016.01.007. Epub 2016 Jan 19/ 14. Andreotti RF, Timmerman D, Strachowski LM, et al. O-RADS US Risk Stratification and Management System: A Consensus Guideline from the ACR Ovarian-Adnexal Reporting and Data System Committee. Radiology. 2020 Jan;294(1):168-185

*Marca solo un óvalo.*

- ☐ De acuerdo
- ☐ En desacuerdo

E. Cáncer  
de  
endometrio

El pilar fundamental del tratamiento del cáncer de endometrio es quirúrgico, siendo la estadificación completa (linfadenectomía pélvica y paraaórtica) ampliamente utilizada en Colombia, la cual no esta exenta de complicaciones mayores (15-17) y hay amplia controversia en cuanto a su papel terapéutico (18-24). Lo que si es claro es que el estado nodal confiere información pronóstica y por lo tanto determina la adyuvancia. En la ultima década ha progresado la implementación del ganglio centinela (detección 86%, sensibilidad 97.2% y VPN 99.6%), sin un detrimento pronóstico(29), y de hecho es recomendado como una alternativa válida y menos mórbida por la guía de la NCCN. (25) Sin embargo, su aplicabilidad requiere una serie de condiciones técnicas y curva de aprendizaje por lo que no esta tan extendida en el territorio nacional. De todas formas, cuando no es posible conocer el estado nodal (estadificación incompleta), la NCCN también avala definir el tratamiento adyuvante de acuerdo a los criterios histopatológicos de la histerectomía, edad e imágenes como alternativa a una re-estadificación (25).

Las pacientes con enfermedad de mejor pronostico comprenden aquellas con tumores endometrioides FIGO 1 sin evidencia de infiltración miometrial. Es por esto que pacientes jóvenes que cumplan estos criterios pueden recibir manejo médico hormonal para conservar fertilidad con tasas de regresión que oscilan alrededor del 72-76% (26). De hecho, en pacientes pobres candidatas quirúrgicas la hormonoterapia es una opción (cuando no hay contraindicaciones) con tasas de efectividad similar (27,28) y aunque se prefiere la radioterapia, ésta implica asistencia casi diaria para la administración de tratamiento. Aunque las alternativas hormonales son variadas, una de las preferidas comprende el dispositivo intrauterino de levonorgestrel, debido a sus menores efectos sistémicos.

En el cáncer de endometrio en estadio avanzado (III) posterior a manejo quirúrgico la NCCN recomienda adyuvancia con quimioterapia y radioterapia secuencial (25). El beneficio adyuvante del tratamiento citotóxico multiagente fue evidenciado en un ensayo clínico aleatorizado – GOG 122 (29), y mas tarde se comprobaría que la adición de radioterapia a estos estadios también presentaba impacto en la supervivencia global (30).

En los casos de enfermedad recurrente se recomiendan diferentes lineas de manejo. Salvo algunas excepciones, la mayoría entrará en la categoría de pacientes paliativos donde uno de los principales objetivos de tratamiento es mejorar calidad de vida. Una alternativa para pacientes sin síntomas agudos para paliación es la hormonoterapia, con tasas de algún tipo de respuesta entre 23 -63% (31)

Referencias:

15. Todo Y, Sakuragi N. Systematic lymphadenectomy in endometrial cancer. J Obstet Gynaecol Res [Internet]. Wiley/Blackwell (10.1111); 2013 Feb 1 [cited 2018 Apr 6];39(2):471–7. Available from: <http://doi.wiley.com/10.1111/j.1447-0756.2012.02062.x>
16. Todo Y, Yamamoto R, Minobe S, Suzuki Y, Takeshi U, Nakatani M, et al. Risk factors for postoperative lower-extremity lymphedema in endometrial cancer survivors who had treatment including lymphadenectomy. Gynecol Oncol [Internet]. 2010 Oct [cited 2018 Apr 6];119(1):60–4. Available from: <http://www.ncbi.nlm.nih.gov/pubmed/20638109>
17. Abu-Rustum NR, Alektiar K, Iasonos A, Lev G, Sonoda Y, Aghajanian C, et al. The incidence of symptomatic lower-extremity lymphedema following treatment of uterine corpus malignancies: A 12-year experience at Memorial Sloan-Kettering Cancer Center. Gynecol Oncol [Internet]. 2006 Nov [cited 2018 Apr 6];103(2):714–8. Available from: <http://www.ncbi.nlm.nih.gov/pubmed/16740298>
18. ASTEC study group, Kitchener H, Swart AMC, Qian Q, Amos C, Parmar MKB. Efficacy of systematic pelvic lymphadenectomy in endometrial cancer (MRC ASTEC trial): a randomised study. Lancet [Internet]. 2009 Jan 10 [cited 2018 Apr 6];373(9658):125–36. Available from: <http://www.ncbi.nlm.nih.gov/pubmed/19070889>
19. Panici PB, Basile S, Maneschi F, Lissoni AA, Signorelli M, Scambia G, et al. Systematic Pelvic Lymphadenectomy vs No Lymphadenectomy in EarlyStage

- Endometrial Carcinoma: Randomized Clinical Trial. JNCI J Natl Cancer Inst [Internet]. 2008 Dec 3 [cited 2018 Apr 6];100(23):1707–16. Available from: <http://www.ncbi.nlm.nih.gov/pubmed/19033573>
20. Todo Y, Kato H, Kaneuchi M, Watari H, Takeda M, Sakuragi N. Survival effect of para-aortic lymphadenectomy in endometrial cancer (SEPAL study): a retrospective cohort analysis. Lancet (London, England) [Internet]. Elsevier; 2010 Apr 3 [cited 2018 Apr 7];375(9721):1165–72. Available from: <http://www.ncbi.nlm.nih.gov/pubmed/20188410>
21. Tong S-Y, Lee J-M, Lee J-K, Kim JW, Cho C-H, Kim S-M, et al. Efficacy of Para-Aortic Lymphadenectomy in Early-Stage Endometrioid Uterine Corpus Cancer. Ann Surg Oncol [Internet]. 2011 May 7 [cited 2018 Apr 7];18(5):1425–30. Available from: <http://www.ncbi.nlm.nih.gov/pubmed/21136177>
22. Eggemann H, Ignatov T, Kaiser K, Burger E, Costa SD, Ignatov A. Survival advantage of lymphadenectomy in endometrial cancer. J Cancer Res Clin Oncol [Internet]. 2016 May 8 [cited 2018 Apr 7];142(5):1051–60. Available from: <http://www.ncbi.nlm.nih.gov/pubmed/26746654>
23. Frost JA, Webster KE, Bryant A, Morrison J. Lymphadenectomy for the management of endometrial cancer. Cochrane Database Syst Rev [Internet]. 2017 Oct 2 [cited 2018 Apr 7];10:CD007585. Available from: <http://www.ncbi.nlm.nih.gov/pubmed/28968482>
24. Guo W, Cai J, Li M, Wang H, Shen Y. Survival benefits of pelvic lymphadenectomy versus pelvic and para-aortic lymphadenectomy in patients with endometrial cancer. Medicine (Baltimore) [Internet]. 2018 Jan [cited 2018 Apr 7];97(1):e0181. Available from: <http://www.ncbi.nlm.nih.gov/pubmed/29381111>
25. NCCN Clinical Practice Guidelines in Oncology (NCCN Guidelines). Uterine Neoplasms Version 1.2020 – March 06,2020.
26. Fan Z, Li H, Hu R, et al. Fertility-Preserving Treatment in Young Women with Grade 1 Presumed Stage IA Endometrial Adenocarcinoma: A Meta-Analysis. Int J Gynecol Cancer. 2018 Feb;28(2):385-393.
27. Baker, W. D., Pierce, S. R., Mills, A. M., Gehrig, P. A., & Duska, L. R. Nonoperative management of atypical endometrial hyperplasia and grade 1 endometrial cancer with the levonorgestrel intrauterine device in medically ill post-menopausal women. Gynecologic Oncology, 146(1), 34–38 (2017).
28. Baker J, Obermair A, Gebiski V, et al. Efficacy of oral or intrauterine device-delivered progestin in patients with complex endometrial hyperplasia with atypia or early endometrial adenocarcinoma: a meta-analysis and systematic review of the literature. Gynecol Oncol. 2012 Apr;125(1):263-70.
29. Randall, M. E., Filiaci, V. L., Muss, H., Spirtos, N. M., Mannel, R. S., Fowler, J., ... Benda, J. A. (2006). Randomized Phase III Trial of Whole-Abdominal Irradiation Versus Doxorubicin and Cisplatin Chemotherapy in Advanced Endometrial Carcinoma: A Gynecologic Oncology Group Study. Journal of Clinical Oncology, 24(1), 36–44.
30. Brown, A. P., Gaffney, D. K., Dodson, M. K., Soisson, A. P., Belnap, T. W., Alleman, K., & Sause, W. T. (2013). Survival Analysis of Endometrial Cancer Patients with Positive Lymph Nodes. International Journal of Gynecological Cancer, 23(5), 861–868.
31. Jerzak KJ, Duska L, MacKay HJ. Endocrine therapy in endometrial cancer: An old dog with new tricks. Gynecologic Oncology 153 (2019) 175–183

25. 19. Está usted de acuerdo en que todas las pacientes con presunto estadio temprano de cáncer de endometrio reciban manejo inicial exclusivo con HAT + SOB con o sin ganglio centinela (de acuerdo a disponibilidad) y definir adyuvancia con factores histopatológicos uterinos? \*

*Marca solo un óvalo.*

- ☐ De acuerdo
- ☐ En desacuerdo

26. 20. ¿Está usted de acuerdo, durante la pandemia, en diferir la anexo-histerectomía en pacientes con cáncer de endometrio endometrioides FIGO 1 sin infiltración miometrial demostrada por resonancia magnética, ofreciéndoles manejo hormonal temporal con DIU de levonorgestrel (cuando se encuentra disponible el recurso) u hormonoterapia oral? \*

*Marca solo un óvalo.*

- ☐ De acuerdo
- ☐ En desacuerdo

27. 21. Está usted de acuerdo que a las pacientes con cáncer de endometrio en estadio avanzado (III) llevadas a manejo quirúrgico se les proporcione la adyuvancia secuencial inicialmente con radioterapia y posteriormente con quimioterapia, pero diferir durante la pandemia la quimioterapia para los de grado 1 y 2? \*

*Marca solo un óvalo.*

- ☐ De acuerdo
- ☐ En desacuerdo

28. 22. Consideraría indicado ofrecer manejo con hormonoterapia en las pacientes paliativas con recaída por cáncer de endometrio endometriode FIGO 1 y 2 sin síntomas agudos mientras se puede iniciar tratamiento medico con quimioterapia o radioterapia (según el caso) tras el control de la pandemia? \*

*Marca solo un óvalo.*

- ☐ De acuerdo
- ☐ En desacuerdo

---

Google no creó ni aprobó este contenido.

Google Formularios
