# Supplementary material
Source: PubMed Central journal article supplement (PMC9087623)
Supplement: IJGO-150-368-s002.pdf [file IJGO-150-368-s002.pdf]

# Sugestões de manejo para pacientes com câncer ginecológico e patologias cervicais pré-invasivas durante a pandemia de COVID-19

## I. Considerações gerais

Este documento não pretende ser uma diretriz de tratamento nem um consenso, uma vez que a metodologia utilizada não permite que ele seja classificado como nenhum dos anteriores. O objetivo deste trabalho é fornecer ao médico elementos de julgamento baseados na literatura médica internacional, orientar o manejo do ambulatório, bem como o tratamento de patologias cervicais e, principalmente, o manejo cirúrgico de pacientes com câncer ginecológico durante a contingência da ordem mundial, produzida por COVID-19.

É necessário racionalizar os recursos cirúrgicos, tendo em vista a limitação que ocorre tanto na disponibilidade de salas cirúrgicas quanto no número de leitos disponíveis para hospitalizar pacientes no pós-operatório. Além disso, as unidades de terapia intensiva potencialmente serão ocupadas por pacientes com necessidade de ventilação mecânica como consequência da infecção pelo coronavírus SARS-2.

É importante diminuir o risco de contágio de maneira bidirecional, para o corpo médico - com o uso adequado dos elementos de proteção individual recomendados para cada área e de acordo com as políticas de cada instituição - e para os pacientes, minimizando o risco de adquirir a infecção por COVID-19, naqueles que podem, do ponto de vista oncológico, aguardar o tratamento cirúrgico e naqueles que não justificam uma exposição (patologias pré-invasivas, baixo risco e / ou bom prognóstico ou por aqueles que podem receber tratamento médico alternativo ou antes do tratamento padrão recomendado).

Nesse período, é de extrema importância discutir o manejo dos pacientes, sempre que possível, em reuniões multidisciplinares, com a participação das diferentes áreas que se articulam com a especialidade, sendo as mais importantes: Cirurgia, Oncologia Clínica, Radioterapia, Patologia e Radiologia.

O tratamento cirúrgico dos pacientes, ou seu adiamento, será derivado de uma discussão aberta e transparente entre os atores envolvidos nas decisões: tratamento médico, especialidades relacionadas, representantes institucionais e, claro, o paciente.

A determinação de levar um paciente com câncer ginecológico para a sala de cirurgia estará sujeita às regulamentações nacionais e institucionais atuais, bem como a cada fase da pandemia e, é claro, à disponibilidade de recursos. Necessidade de testar todos os pacientes em busca de coronavírus SARS-2 (disponibilidade de PCR e / ou testes rápidos), determinações sobre a natureza urgente da cirurgia, disponibilidade de equipamento de proteção individual (EPI) adequado para o pessoal da sala de operações, etc.

É de vital importância, na boa relação médico-paciente, esclarecer o diagnóstico oncológico e seu prognóstico, bem como o risco de variabilidade neste último, de acordo com as mudanças e ajustes no tratamento e fase da epidemia. Recomenda-se considerar no consentimento informado o risco de adquirir a infecção por COVID19 - por estar em um centro hospitalar - e, principalmente em caso de necessidade de tratamento cirúrgico.

Os membros da Associação Colombiana de Oncologistas Ginecológicos (ACGO), bem como os Drs. Eduardo Guerrero (Radioterapeuta) e Marc Pierre (Oncologista Clínico) participam da preparação deste documento.

A Sociedade Brasileira de Cirurgia Oncológica traduziu e adaptou o texto para aplicação no Brasil.

O documento final, que será divulgado após a pesquisa, será assinado pela Associação Colombiana de Oncologistas Ginecológicos, Sociedade Brasileira de Cirurgia Oncológica e Instituto Nacional do Câncer da Colombia.

**\*Obligatorio**

1. Dirección de correo electrónico \*

---

2. Data da resposta \*

---

*Ejemplo: 7 de enero de 2019*

Características sociodemográficas

3. Idade \*

*Marca solo un óvalo.*

☐ Menor de 35

☐ 35-44

☐ 45-54

☐ 55-64

☐ > 65

#### 4. Sexo \*

*Marca solo un óvalo.*

☐ Feminino

☐ Masculino

## II.Considerações específicas

O novo coronavírus é altamente contagioso. Taxas de transmissão de SARS-CoV-2 re com um ambiente hospitalar de até 41% foram descritas (1). De acordo com as diretrizes do Ministério da Saúde (Brasil), o país está atualmente sob medidas de isolamento social, forçando a população a ficar em casa para conter o surto. O mesmo se acontece com diferentes graus de intensidade do isolamento em outros países da America Latina.

Esse comportamento reduz o risco de infecção para pacientes, funcionários e prestadores, mas também para outras pessoas em contato com eles. (2) O desafio para o oncologista nesse cenário é continuar fazendo um diagnóstico precoce de patologias neoplásicas em sua fase inicial e como uma doença recorrente. Por outro lado, o fraco desempenho dos testes diagnósticos de rotina e a importância de direcionar os sintomas para uma busca direcionada à recidiva tumoral foram previamente estabelecidos (3).

Sob essa premissa, a teleconsulta é uma ferramenta eficiente para a triagem de pacientes que necessitam de uma avaliação presencial, reduzindo a exposição desnecessária de pacientes com câncer a um ambiente hospitalar. Um diálogo aberto com pacientes e / ou familiares é essencial, esclarecendo que a adoção dessa modalidade responde a um esforço para reduzir o risco durante a pandemia. Nesta modalidade, devem-se considerar tanto as videoconferências, chamadas telefônicas ou comunicações por email devidamente registradas. Como ato médico, deve-se registrá-las no prontuário médico conforme determinação do Conselho Federal de Medicina do Brasil.

### Referências

1. Xiao Y, Tan C, Duan J, Wu A, Li C. An Effective Model for the Outpatient Management of COVID-19. Infect Control Hosp Epidemiol. 2020; 1-4
2. Pathoulas JT, Stoff BK, Lee KC, Farah RS. Ethical Outpatient Dermatology Care During the Coronavirus (COVID-19) Pandemic [published online ahead of print, 2020 Mar 26]. J Am Acad Dermatol. 2020;S0190-9622(20)30467-9.
3. Salani R, Khanna N, Frimer M, Bristow RE, Chen LM. An update on post-treatment surveillance and diagnosis of recurrence in women with gynecologic malignancies: Society of Gynecologic Oncology (SGO) recommendations. Gynecol Oncol. 2017;146(1):3–10. doi:10.1016/j.ygyno.2017.03.022

5. 1. Você considera que pacientes com alta suspeita de neoplasia ginecológica (massa anexial) ou com diagnóstico histológico confirmado de câncer ginecológico devem ser avaliadas pela primeira vez pessoalmente? \*

*Marca solo un óvalo.*

- ☐ Concordo
- ☐ Não concordo

6. 2. Você considera que as pacientes em pós-operatória de câncer ginecológico, para orientação sobre o resultado da anatomia patológica, devem ser avaliadas \*

*Marca solo un óvalo.*

- ☐ Concordo
- ☐ Não concordo

7. 3. Considera que as pacientes diagnosticados com neoplasia ginecológica no acompanhamento pós-tratamento devem ser contatados por teleconsulta, perguntados sobre sintomas que possam suspeitar de doença recorrente e, se houver, chama-los para consulta presencial com o exame físico a fim de descartar recaídas tumor? \*

*Marca solo un óvalo.*

- ☐ Concordo
- ☐ Não concordo

8. 4. Considera que as pacientes com diagnóstico de câncer ginecológico no seguimento pós-tratamento devem ser contatadas por teleconsulta, indagar sobre sintomas que possam levar à suspeita de doença recorrente e, se não os apresentar, citá-los nos três meses seguintes após o controle da pandemia, continuar o monitoramento institucional? \*

*Marca solo un óvalo.*

- ☐ Concordo
- ☐ Não concordo

9. 5. Você acha que a teleconsulta deve ser realizada pelo oncologista-ginecologista das instituições? \*

*Marca solo un óvalo.*

- ☐ Concordo
- ☐ Não concordo

10. 5.1 Em caso de desacordo, qual pessoal de saúde que você sugere para realizar esse processo?

---

---

---

---

---

11. 6. Se você considera que a paciente deve ser avaliado pessoalmente, sugere que a triagem seja feita por teleconsulta em busca de um caso suspeito de Covid-19, de acordo com os critérios epidemiológicos atuais? \*

*Marca solo un óvalo.*

- ☐ Concordo
- ☐ Não concordo

**B.**  
**Patologia**  
**cervical**  
**pré-**  
**invasiva**

A American Society for Colposcopy and Cervical Pathology (ASCCP) publicou em 2020 diretrizes específicas para o tratamento da patologia cervical.(4) A luz da atual pandemia do COVID-19 e em locais onde todas as visitas não essenciais ao consultório médico e procedimentos eletivos foram suspensos, a ASCCP gerou recomendações para a abordagem da patologia pré-invasiva cervical (5). Não há diretrizes específicas sobre o tipo de conização a ser realizada. Em qualquer uma das técnicas (eletrocirurgia, conização a frio), sugere-se o uso de elementos de proteção individual para prevenção de contágio por coronavírus (COVID-19). Essas recomendações não devem ser consideradas diretrizes definitivas e reconhecem que algumas pessoas com testes de detecção anormais para câncer do colo do útero e os achados histológicos exigirão uma revisão caso a caso (5).

Uma vez controlado o surto de COVID-19, os pacientes devem ser tratados novamente de acordo com os padrões da ASCCP Colposcopy(4)

**Referências**

4. Perkins RB, Guido RS, Castle PE, Chelmow D, Einstein MH, Garcia F, et al. 2019 ASCCP Risk-Based Management Consensus Guidelines for Abnormal Cervical Cancer Screening Tests and Cancer Precursors. J Low Genit Tract Dis. 2020 Apr;24(2):102-131. doi: 10.1097/LGT.0000000000000525.

5. ASCCP Interim Guidance for Timing of Diagnostic and Treatment Procedures for Patients with Abnormal Cervical Screening Tests. Disponible online. <https://www.asccp.org/covid-19>. Acceso el 30 de marzo de 2020

12. 7. As pacientes que apresentam citologia cervicovaginal com lesões de baixo grau com ou sem teste de DNA-HPV (+) podem ser adiados para avaliação colposcópica por pelo menos 6 meses? \*

*Marca solo un óvalo.*

- ☐ Concordo
- ☐ Não concordo

13. 8. Pacientes que apresentam citologia cervicovaginal com lesão epitelial de alto grau com ou sem teste de DNA-HPV (+) podem ser adiados para avaliação colposcópica em 3 meses? \*

*Marca solo un óvalo.*

- ☐ Concordo  
☐ Não concordo

14. 9. Pacientes que apresentam biópsia com NIC II-III ou adenocarcinoma in situ, sem suspeita de infiltração, podem demorar no tratamento da excisão por 3 meses? \*

*Marca solo un óvalo.*

- ☐ Concordo  
☐ Não concordo

15. 10. Pacientes que apresentam uma biópsia com lesão de alto grau e suspeita de microinvasão na colposcopia podem adiar o tratamento excisional por um período máximo de um mês? \*

*Marca solo un óvalo.*

- ☐ Concordo  
☐ Não concordo

16. 11. Pacientes que apresentam indicação para conização diagnóstica (falta de correlação entre citologia - colposcopia-biópsia, curetagem endocervical positiva), poderiam atrasar o tratamento por excisão por 3 meses? \*

*Marca solo un óvalo.*

- ☐ Concordo  
☐ Não concordo

## C. Câncer do colo do útero

Nestes momentos de contingência, algumas alternativas foram consideradas no manejo de pacientes com neoplasia cervical.

17. 12. Você concorda em oferecer tratamento primário com radioterapia (+ quimioterapia concomitante) a um paciente na pós-menopausa (> 50 anos) com câncer cervical em estágio inicial, com lesão visível ou pós-conização com margens positivas, que normalmente seria candidato ao tratamento cirúrgico (6) \*

Referência: 6. NCCN Guidelines: Radiation can be an option for medically inoperable patients or those who refuse surgery. Lancet. 1997;350(9077):535.

*Marca solo un óvalo.*

- ☐ Concordo
- ☐ Não concordo

18. 13. Você concorda em oferecer a um paciente com câncer de colo pós-conização com margens negativas ou com diagnóstico de biópsia sem doença cervical visível, sem desejo de preservar a fertilidade, sem suspeita de envolvimento linfonodal por imagem, adiar tratamento definitivo mínimo por 3 meses (7,8) \*

Referências 7. Ramirez PT, Pareja R, Rendón GJ et al. Management of low-risk early-stage cervical cancer: should conization, simple trachelectomy, or simple hysterectomy replace radical surgery as the new standard of care? Gynecol Oncol. 2014 Jan;132(1):254-9 / 8. Halaska MJ, Uzan C, Han SN, et al. Characteristics of patients with cervical cancer during pregnancy: a multicenter matched cohort study. An initiative from the International Network on Cancer, Infertility and Pregnancy. Int J Gynecol Cancer. 2019 Mar 20

*Marca solo un óvalo.*

- ☐ Concordo
- ☐ Não concordo

19. 14. Você concorda em NÃO realizar estadiamento cirúrgico laparoscópico de pacientes com câncer de colo localmente avançado, antes do tratamento com quimioterapia e radioterapia? (9) \*

Referência: 9. Pedro T Ramirez, Rene Pareja, Ane Gerda Z Eriksson, Michael Frumovitz. International Gynecologic Cancer Society 2019 meeting summary. Int J Gynecol Cancer 2020;30:167.

*Marca solo un óvalo.*

- ☐ Concordo
- ☐ Não concordo

20. 15. Você concorda em NÃO agendar cirurgia para pacientes com recorrência central do câncer do colo do útero, com mais de 6 meses de período livre de doença, candidatos a exenteração e, em vez disso, consulte a oncologia clínica para tratamento quimioterápico. ? (10) \*

Referência: 10. Tewari KS, Sill MW, Long HJ 3rd, et al. Improved survival with bevacizumab in advanced cervical cancer. N Engl J Med. 2014 Feb 20;370(8):734-43.

*Marca solo un óvalo.*

- ☐ Concordo
- ☐ Não concordo

D.  
Câncer  
de  
ovário.

Dada essa patologia que vemos todos os dias em proporções maiores, especialmente casos avançados, na qual é importante trabalhar em equipe com diagnóstico por imagem, patologia, oncologia clínica e cirurgia oncológica, devemos ter a consideração especial de que devemos agilizar a abordagem inicial, recorrendo à confirmação do diagnóstico de pré-tratamento com base na citologia e não na histologia usando cirurgia laparoscópica (padrão de atendimento hoje).

21. 16. Em pacientes com aparente câncer epitelial do ovário avançado, com ascite e carcinomatose, com elevação de Ca 125, com patologia demonstrada por citologia ou por biópsia com agulha de corte, é preferível fazer QT neoadjuvante com carbo / Taxol por 3-4 ciclos e, em seguida, cirurgia de intervalo, de acordo com a evolução clínica e de imagem (11) \*

Referência: 11. Vergote I, Coens C, Nankivell M, et al, on behalf of EORTC; MRC CHORUS study investigators. Neoadjuvant chemotherapy versus debulking surgery in advanced tubo-ovarian cancers: pooled analysis of individual patient data from the EORTC 55971 and CHORUS trials. Lancet Oncol. 2018 Dec;19(12):1680-1687.2.

*Marca solo un óvalo.*

- ☐ Concordo
- ☐ Não concordo

22. 17. Em pacientes sensíveis à platina com recorrência atual de mais de um local, recomenda-se quimioterapia à base de platina (com ou sem bevacizumabe), em vez de cito-redução secundária. (12) \*

Referência: 12. Coleman RL, Spirtos NM, Enserro D, et al. Secondary Surgical Cytoreduction for Recurrent Ovarian Cancer. N Engl J Med. 2019 Nov 14;381(20):1929-1939

*Marca solo un óvalo.*

- ☐ Concordo
- ☐ Não concordo

23. 18. Pacientes com massas pélvicas e suspeita de câncer de ovário serão triadas pelo oncologista ginecológico. Aquelas com risco significativo de malignidade, com base em critérios e imagens clínicas e marcador disponível, determinado por um ginecologista oncologista, serão submetidos à cirurgia com congelação (de acordo com a disponibilidade do serviço). Os demais serão derivados para tratamento por ginecologia e obstetrícia (13,14) \*

Referências: 13. Timmerman D, Van Calster B, Testa A, et al. Predicting the risk of malignancy in adnexal masses based on the Simple Rules from the International Ovarian Tumor Analysis group. Am J Obstet Gynecol. 2016 Apr;214(4):424-437. doi: 10.1016/j.ajog.2016.01.007. Epub 2016 Jan 19/ 14. Andreotti RF, Timmerman D, Strachowski LM, et al. O-RADS US Risk Stratification and Management System: A Consensus Guideline from the ACR Ovarian-Adnexal Reporting and Data System Committee. Radiology. 2020 Jan;294(1):168-185

*Marca solo un óvalo.*

☐ Concordo

☐ Não concordo

## E. Câncer endometrial

O pilar fundamental do tratamento do câncer endometrial é o cirúrgico, com estadiamento completo (linfadenectomia pélvica e para-aórtica) sendo amplamente utilizado na América Latina, o que não deixa de ter grandes complicações (15-17) e há grande controvérsia quanto ao seu papel terapêutico. (18-24) O que está claro é que o estadiamento linfonodal confere informações prognósticas e, portanto, determina a adjuvância. Na última década, a implementação do linfonodo sentinela progrediu (detecção de 86%, sensibilidade de 97,2% e VPN de 99,6%), sem prejuízo prognóstico (29) e, de fato, é recomendada como alternativa válida e menos mórbida pela orientação do NCCN. (25) No entanto, a sua aplicabilidade requer uma série de condições técnicas e uma curva de aprendizado, por isso não é tão difundida no território nacional. De qualquer forma, quando não é possível conhecer o estadiamento linfonodal (estadiamento incompleto), o NCCN também apóia a definição do tratamento adjuvante de acordo com os critérios histopatológicos da histerectomia, idade e imagem como alternativa ao re-estadiamento cirúrgico (25).

As pacientes com melhor prognóstico da doença incluem aqueles com tumores endometrioides EC I da FIGO sem evidência de infiltração miometrial. É por isso que pacientes jovens que atendem a esses critérios podem receber tratamento médico hormonal para preservar a fertilidade com taxas de regressão que variam de 72 a 76% (26). Em pacientes de alto risco cirúrgico, a terapia hormonal é uma opção (quando não há contra-indicações) com taxas de efetividade semelhantes (27,28) e, embora a radioterapia seja preferida, implica assistência quase diária para a administração do tratamento. Embora as alternativas hormonais sejam variadas, uma das preferidas inclui o dispositivo intra-uterino do levonorgestrel, devido aos seus efeitos sistêmicos mais baixos.

No câncer endometrial em estágio avançado (III) após tratamento cirúrgico, a NCCN recomenda quimioterapia adjuvante e radioterapia sequencial (25). O benefício adjuvante do tratamento citotóxico multiagente foi evidenciado em um ensaio clínico randomizado - GOG 122 (29), e posteriormente verificou-se que a adição de radioterapia nesses estágios também teve impacto na sobrevida global (30).

Em casos de doenças recorrentes, diferentes linhas de manejo são recomendadas. Com algumas exceções, a maioria se enquadra na categoria de pacientes paliativos, onde um dos principais objetivos do tratamento é melhorar a qualidade de vida. A terapia hormonal é uma alternativa para pacientes sem sintomas agudos graves, com taxas de resposta entre 23 e 63% (31)

### Referências:

15. Todo Y, Sakuragi N. Systematic lymphadenectomy in endometrial cancer. J Obstet Gynaecol Res [Internet]. Wiley/Blackwell (10.1111); 2013 Feb 1 [cited 2018 Apr 6];39(2):471–7. Available from: <http://doi.wiley.com/10.1111/j.1447-0756.2012.02062.x>
16. Todo Y, Yamamoto R, Minobe S, Suzuki Y, Takeshi U, Nakatani M, et al. Risk factors for postoperative lower-extremity lymphedema in endometrial cancer survivors who had treatment including lymphadenectomy. Gynecol Oncol [Internet]. 2010 Oct [cited 2018 Apr 6];119(1):60–4. Available from: <http://www.ncbi.nlm.nih.gov/pubmed/20638109>
17. Abu-Rustum NR, Alektiar K, Iasonos A, Lev G, Sonoda Y, Aghajanian C, et al. The incidence of symptomatic lower-extremity lymphedema following treatment of uterine corpus malignancies: A 12-year experience at Memorial Sloan-Kettering Cancer Center. Gynecol Oncol [Internet]. 2006 Nov [cited 2018 Apr 6];103(2):714–8. Available from: <http://www.ncbi.nlm.nih.gov/pubmed/16740298>
18. ASTEC study group, Kitchener H, Swart AMC, Qian Q, Amos C, Parmar MKB. Efficacy of systematic pelvic lymphadenectomy in endometrial cancer (MRC ASTEC trial): a randomised study. Lancet [Internet]. 2009 Jan 10 [cited 2018 Apr 6];373(9658):125–36. Available from: <http://www.ncbi.nlm.nih.gov/pubmed/19070889>
19. Panici PB, Basile S, Maneschi F, Lissoni AA, Signorelli M, Scambia G, et al. Systematic Pelvic Lymphadenectomy vs No Lymphadenectomy in EarlyStage Endometrial Carcinoma: Randomized Clinical Trial. JNCI J Natl Cancer Inst [Internet].

- 2008 Dec 3 [cited 2018 Apr 6];100(23):1707–16. Available from: <http://www.ncbi.nlm.nih.gov/pubmed/19033573>
20. Todo Y, Kato H, Kaneuchi M, Watari H, Takeda M, Sakuragi N. Survival effect of para-aortic lymphadenectomy in endometrial cancer (SEPAL study): a retrospective cohort analysis. *Lancet* (London, England) [Internet]. Elsevier; 2010 Apr 3 [cited 2018 Apr 7];375(9721):1165–72. Available from: <http://www.ncbi.nlm.nih.gov/pubmed/20188410>
21. Tong S-Y, Lee J-M, Lee J-K, Kim JW, Cho C-H, Kim S-M, et al. Efficacy of Para-Aortic Lymphadenectomy in Early-Stage Endometrioid Uterine Corpus Cancer. *Ann Surg Oncol* [Internet]. 2011 May 7 [cited 2018 Apr 7];18(5):1425–30. Available from: <http://www.ncbi.nlm.nih.gov/pubmed/21136177>
22. Eggemann H, Ignatov T, Kaiser K, Burger E, Costa SD, Ignatov A. Survival advantage of lymphadenectomy in endometrial cancer. *J Cancer Res Clin Oncol* [Internet]. 2016 May 8 [cited 2018 Apr 7];142(5):1051–60. Available from: <http://www.ncbi.nlm.nih.gov/pubmed/26746654>
23. Frost JA, Webster KE, Bryant A, Morrison J. Lymphadenectomy for the management of endometrial cancer. *Cochrane Database Syst Rev* [Internet]. 2017 Oct 2 [cited 2018 Apr 7];10:CD007585. Available from: <http://www.ncbi.nlm.nih.gov/pubmed/28968482>
24. Guo W, Cai J, Li M, Wang H, Shen Y. Survival benefits of pelvic lymphadenectomy versus pelvic and para-aortic lymphadenectomy in patients with endometrial cancer. *Medicine* (Baltimore) [Internet]. 2018 Jan [cited 2018 Apr 7];97(1):e012345. Available from: <http://www.ncbi.nlm.nih.gov/pubmed/29123456>
25. NCCN Clinical Practice Guidelines in Oncology (NCCN Guidelines). Uterine Neoplasms Version 1.2020 – March 06,2020.
26. Fan Z, Li H, Hu R, et al. Fertility-Preserving Treatment in Young Women with Grade 1 Presumed Stage IA Endometrial Adenocarcinoma: A Meta-Analysis. *Int J Gynecol Cancer*. 2018 Feb;28(2):385-393.
27. Baker, W. D., Pierce, S. R., Mills, A. M., Gehrig, P. A., & Duska, L. R. Nonoperative management of atypical endometrial hyperplasia and grade 1 endometrial cancer with the levonorgestrel intrauterine device in medically ill post-menopausal women. *Gynecologic Oncology*, 146(1), 34–38 (2017).
28. Baker J, Obermair A, Gebiski V, et al. Efficacy of oral or intrauterine device-delivered progestin in patients with complex endometrial hyperplasia with atypia or early endometrial adenocarcinoma: a meta-analysis and systematic review of the literature. *Gynecol Oncol*. 2012 Apr;125(1):263-70.
29. Randall, M. E., Filiaci, V. L., Muss, H., Spirtos, N. M., Mannel, R. S., Fowler, J., ... Benda, J. A. (2006). Randomized Phase III Trial of Whole-Abdominal Irradiation Versus Doxorubicin and Cisplatin Chemotherapy in Advanced Endometrial Carcinoma: A Gynecologic Oncology Group Study. *Journal of Clinical Oncology*, 24(1), 36–44.
30. Brown, A. P., Gaffney, D. K., Dodson, M. K., Soisson, A. P., Belnap, T. W., Alleman, K., & Sause, W. T. (2013). Survival Analysis of Endometrial Cancer Patients with Positive Lymph Nodes. *International Journal of Gynecological Cancer*, 23(5), 861–868.
31. Jerzak KJ, Duska L, MacKay HJ. Endocrine therapy in endometrial cancer: An old dog with new tricks. *Gynecologic Oncology* 153 (2019) 175–183

24. 19. Você concorda que todos os pacientes com suposto estágio inicial de câncer endometrial recebem tratamento inicial exclusivo com HTA + SOB com ou sem linfonodo sentinela (de acordo com a disponibilidade) e definir adjuvancia com fatores histopatológicos uterinos? \*

*Marca solo un óvalo.*

- ☐ Concordo
- ☐ Não concordo

25. 20. Você concorda, durante a pandemia, em adiar a histerectomia em anexo em pacientes com câncer de endométrio endometriode FIGO 1 sem infiltração miometrial demonstrada por RM, oferecendo-lhes tratamento hormonal temporário com DIU de levonorgestrel (quando o recurso está disponível) ) ou terapia hormonal oral? \*

*Marca solo un óvalo.*

- ☐ Concordo
- ☐ Não concordo

26. 21.Você concorda que pacientes com câncer endometrial em estágio avançado (III) submetidos a tratamento cirúrgico recebem tratamento adjuvante sequencial inicialmente com radioterapia e posteriormente com quimioterapia. Mas atrasar a quimioterapia durante a epidemia para tumores grau 1 e 2? \*

*Marca solo un óvalo.*

- ☐ Concordo.
- ☐ Não concordo.

27. 22. Você consideraria apropriado oferecer manejo hormonal em pacientes paliativos com recidiva por câncer endometriode EC I e II da FIGO sem sintomas agudos, enquanto o tratamento com quimioterapia ou radioterapia (conforme apropriado) pode ser iniciado após o controle da pandemia? \*

*Marca solo un óvalo.*

- ☐ Concordo
- ☐ Não concordo

---

Google no creó ni aprobó este contenido.

Google Formularios
